1 *Running Header: Sorry, we're open*

2 **Sorry, we're open: Golden Open Access and inequality in the natural sciences**

3 *Russell J Gray*

4 705 Alligator Ranch Rd. New Smyrna Beach, Florida, USA. 32168. [rjgrayherpetology@gmail.com](mailto:rjgrayherpetology@gmail.com)

5

6 **Abstract**

7 Global Open Access (GOA) journals make research more accessible and therefore more citable; however,  
8 the publication fees associated with GOA journals can be costly and therefore not a viable option for many  
9 researchers seeking high-impact publication outlets. In this study, I collect metadata from 237 open-access  
10 natural science journals and analyze them in terms of Article Processing Charges (APC), Impact Factor  
11 (IF), Eigen Factor (EF), citability, and country of publisher. The results of this study provide evidence that  
12 with IF, EF, and citability all increase as APC increases, and each of these metrics are higher in publishers  
13 from developed countries in comparison to developing countries. Implications of these trends are discussed  
14 in regards to natural sciences and inequality within the global scientific community.

15

16 **Introduction**

17 With the prominence of entities such as Sci-Hub (Black Open Access) and ResearchGate (Green Open  
18 Access), the availability of journal articles has increased and all but nullified the previous paywall system  
19 from creating capital for journals (Fuchs and Sandoval, 2013). While this increase in accessibility of  
20 scientific literature has removed constraints of researchers and the general public on a global scale, it has  
21 also caused many high-impact journals to transition to mandatory open access, also known as Golden Open  
22 Access (GOA), in order to continue their profitability through scientific publication (Piwowar, et al. 2018;

23 Lewis, 2012; Harnad, et al. 2008). Although the concept of open-access science may seem genuine on its  
24 face, the cost associated with publishing in open-access journals, and through this cost, perceived reliability  
25 and importance, is what makes this system problematic.

26         Although many journals enable funding assistance for certain countries and institutions, and Article  
27 Processing Charges (APC) can sometimes be factor into project funding, this isn't the case for all  
28 researchers and projects, especially when it comes to more expensive, prestigious journals. A study by  
29 Ellers et al. (2017) provided evidence that researchers from institutions in developing countries are still  
30 paying the full price of developed western nations to publish in high-impact "Mega-Journals" in order to  
31 gain exposure and credibility for their research. Unfortunately, the alternative, especially when it comes to  
32 open-access, is to publish in journals with a lower Impact Factor (IF); otherwise, the author publish in  
33 predatory journals which have low-quality peer review, or publish other questionable articles which then  
34 impact the credibility of a manuscript by affiliation (Beall, 2013).

35         In the current system of academic publishing, the publication process can be an incredibly stressful  
36 for researchers, and in many cases time-consuming (Björk and Solomon 2013). One of the most important  
37 benefits of high-impact journals are their ability to generate exposure through increased citations. Since  
38 high-impact journals have built a reputation of credibility, the review process, and therefore the content of  
39 the publication is not questioned as much as a non-reputable journal with a lower impact-factor, which can  
40 cause immediate and noticeable acceleration in the careers of researchers (Reich, 2013). However, the  
41 prices of high-impact GOA journals become problematic for researchers without available funding to  
42 publish, because options to make potentially important research impactful become more and more narrow.

43         In this study, I analyze metadata of open-access journals to determine links between publication  
44 costs, impact factor, eigen factor, and citability for journals pertaining to the natural sciences. I then discuss  
45 the implications of inequality among the global scientific community in regards to the open-access  
46 framework and its costly limitations.

## 47 **Methods**

48 Data from the Directory of Open Access Journals (Morrison, 2008) was used to acquire journal name, APC,  
49 country of publisher, and currency records (n = 14275). R statistical software was used for all data analyses;  
50 packages used in the analyses included: 1) the scholar package (Keirstead, 2016) to generate impact factors  
51 using journal name strings; 2) the quantmod package (Ryan et al. 2019) to convert all currencies to USD  
52 for standardization; 3) the dplyr package (Wickham et al. 2015) and reshape2 package (Wickham, 2012) to  
53 clean and select specific data, and 4) ggplot2 package (Wickham et al. 2016) for data visualizations.

54 A subset of journals (n = 1047) which had topics relative to the biological sciences was queried by  
55 creating a subset of keyword data from the original Directory of Open Access dataset (e.g. ecology,  
56 conservation, agriculture, species, forest, etc.). Large disparities between natural sciences and medical  
57 science in relation to impact factor, so to further clean the data, journals with an IF >40 were excluded from  
58 the analysis. The excluded journals were checked to via keywords to ensure none were related to the natural  
59 sciences; excluded journals were related to oncology, medical, and engineering. The final analyses were  
60 performed on a deeply vetted dataset of open-access, natural science journals (n = 237).

61 In order to explore potential trends in the data, APC was examined in relation to citability (total  
62 number of citations), IF (general impact of the journal), and Eigen Factor (relative importance of the  
63 journal). The country of each journal publisher was also examined against cost, citability, IF, and Eigen  
64 Factor (EF hereafter) to locate any potential disparities between them. Using functions from the ggpubr  
65 package (Kassambara, 2020), Pearson's correlation coefficient was used to analyze potential correlation  
66 between APC, IF, EF, and citability of journals. Country of publisher was also examined in order to  
67 determine if there were any trends between country and APC, IF, EG, and citability.

68

69

## 70 **Results**

71 A linear trend was found between IF, EF, and citability in relation to APC. Additionally, it was found that  
72 journal publishers from developed countries were more likely to have higher APC, IF, EF, and citability  
73 (Figure 1). Mean APC of open-access journals analyzed ( $n = 237$ ) was \$1344.27 USD, mean IF was 2.855,  
74 mean EF was 0.017, and mean total citation count or citability was 5925.92. APC was found to be  
75 significantly positively correlated with IF (Pearson correlation:  $r(237) = 0.391$ ,  $p < .001$ ). There was also a  
76 highly significant positive correlation between APC and EF (Pearson correlation:  $r(237) = 0.303$ ,  $p < .001$ ).  
77 Finally, there was a highly significant positive correlation between APC and citability (Pearson correlation:  
78  $r(237) = 0.323$ ,  $p < .001$ ).

79 Journals published in the United States, United Kingdom, Ukraine, Thailand, Switzerland, Saudi  
80 Arabia, Poland, Netherlands, South Korea, Germany, Canada, Bulgaria, Brazil, and Australia were more  
81 likely to have an IF above the overall mean than undeveloped countries. Journals published in the United  
82 States, United Kingdom, Thailand, Switzerland, and the Netherlands were more likely to have an EF above  
83 the overall mean. Journals published in the United States, United Kingdom, Thailand, Switzerland,  
84 Netherlands, and Germany were more likely to have more total citations than the mean citability of other  
85 nations. Publishing cost was highest journals from the United States, United Kingdom, Switzerland,  
86 Netherlands, and Germany.

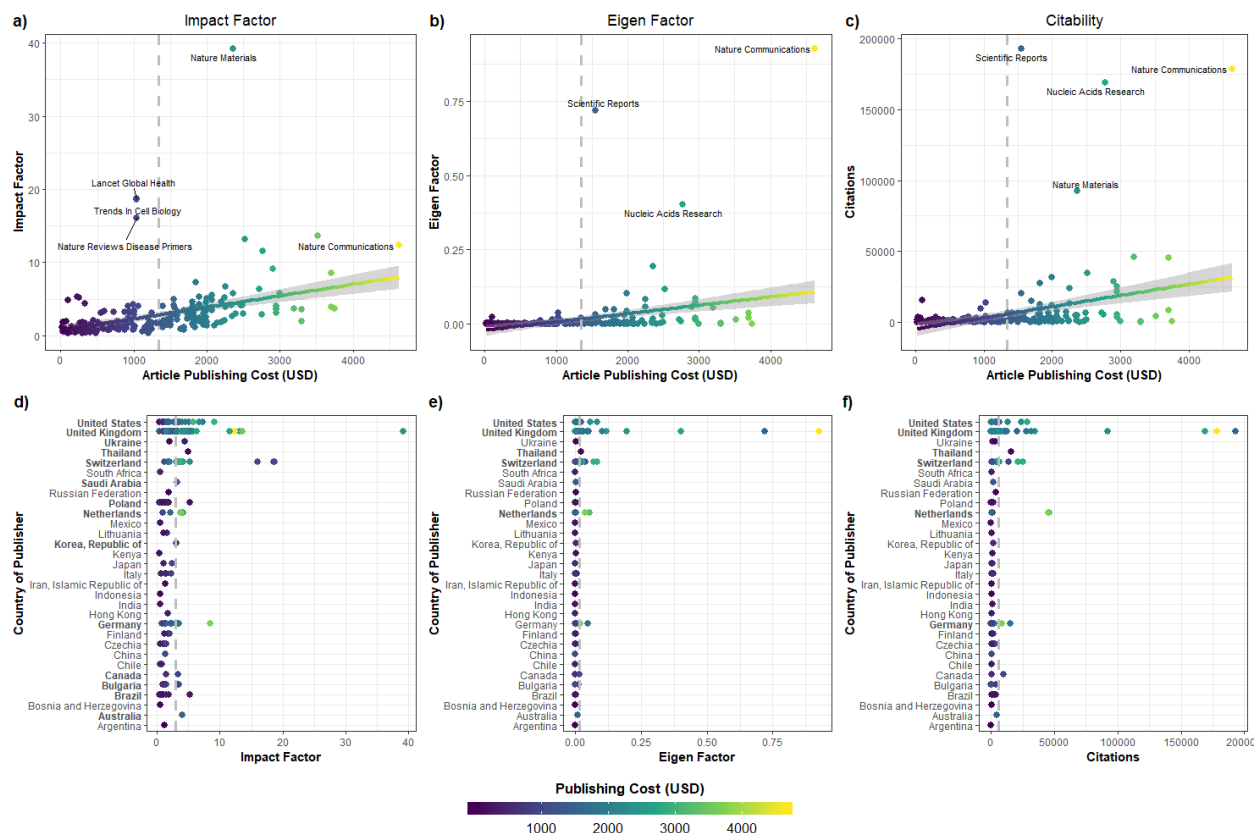

87  
 88 **Figure 1.** Trends in IF, EF, and citability: a) APC and IF, b) APC and EF, c) APC and total number of  
 89 citations; for each of the three upper graphs, mean APC is represented as a dashed vertical line for each of  
 90 the three upper graphs, a General Linear Model (GLM) trendline is fitted to the data with standard error  
 91 shadow, and outliers are labeled with the journal name; d) IF of journals by country of publishers; e) EF of  
 92 journals by country of publishers; f) citability of journals by country of publishers; for the three lower  
 93 graphs, all publishing countries which exceed the mean IF, EF, and citation total (dashed vertical line) are  
 94 represented in bold.

95  
 96 **Discussion**

97 The data in this study shows that with increasing publishing costs, the impact (IF), importance (EF),  
 98 and overall number of citations in open-access natural science journals also increase. The data also shows

99 that the majority of journal publishers with the highest APC, IF, EF, and citability are from developed  
100 countries, which indicates that research published in journals from developing countries is less likely to  
101 gain exposure, while journals from developing countries are less likely to generate profit and, more  
102 importantly, credibility.

103 Expensive APC in prestigious journals are not linked to reliability of the research published in them  
104 (Brembs, 2018). Additionally, the impact factor of prestigious journals also creates a false perception of  
105 reliability in research they have published (Brembs, 2013). The paradox of GOA journals is that the system  
106 itself is inherently flawed, where the more manuscripts a journal publishes, the more capital it stands to  
107 generate, which gives rise to predatory journals and editorial complacency (Beall 2013). Therefore, GOA  
108 journals may create an environment where publisher profit is prioritized over scientific integrity of  
109 published research, while still maintaining prestige as an outlet of highly-credible research over other  
110 journals.

111 Unfortunately, the irregular distribution of resources throughout the world, and correspondingly in  
112 academia, creates a bubble where higher ranking institutions have more access to expensive, higher impact  
113 journals, while lower ranking institutions are forced to publish in less expensive or closed access journals  
114 (Siler, et al. 2018). The alternative is that authors from developing countries have to pay the prices of  
115 developed countries in order to have access to higher impact journals (Ellers, 2017). The options become  
116 even more narrow for individual researchers and groups who have no academic institutional affiliation,  
117 whether it be by personal career choice, transitional period, or numerous other situations that prevent the  
118 benefits of institutional finance allowances (Burchardt, 2014). This is increasingly more problematic for  
119 scientific output, as independent researchers with no institutional affiliation have been on the rise over the  
120 past decade (ElSabry, 2017). However, evidence suggests that the researchers being put on the backburner,  
121 are no less reliable than the privileged few institutions which have the advantages to publish in high impact,  
122 high APC journals (Brembs, 2018; Brembs, 2013; ElSabry, 2017; Siler, et al. 2018).

123           Although there are many financial support options for GOA journals, there are also many caveats  
124 to their eligibility criteria. For example, once an international collaborator from a developed country is  
125 named as an author on a manuscript of authors which would otherwise be eligible for publication funding  
126 assistance such as Research4Life (Research4Life, 2015), the eligibility for financial assistance becomes  
127 void. I know this from personal experience after being rejected from funding assistance multiple times  
128 while attempting to publishing important studies on the critically endangered Sumatran elephant in GOA  
129 journals. While my co-authors were from eligible developing countries, I am from the United States, but  
130 have no current institutional affiliation and therefore none of the accompanying financial benefits, and none  
131 of us had access to the >1000 USD for publication fees. Does this mean the research we were reporting is  
132 not important, or reliable? Not at all. However, our options were narrowed significantly down to low-impact  
133 journals, which consequently are cited much less, and generally seen as less credible sources of scientific  
134 information. Cases like this for others may force an author to be removed from a manuscript in order to  
135 gain access to publication funds, which is not an environment that the process of publishing scientific  
136 research should ever be responsible of creating; nor should potentially important research on conservation  
137 of critically endangered species fly under the academic radar due to APC funding constraints preventing  
138 research exposure.

139           Since the journals analyzed in this study are related to natural sciences, this results also have  
140 implications for the research regarding ecology and conservation of species. Most biodiversity hotspots are  
141 located in the tropics; therefore, the vast majority of conservation research is conducted in tropical regions  
142 (Myers et al 2000). While many nations in tropical regions fall within the criteria for APC assistance from  
143 Research4Life as they are considered developing or under-developed countries (Research4Life, 2020), the  
144 majority of research coming from these undeveloped tropical regions historically include authors from  
145 developed countries (Stocks, 2008). With the current criteria systems in place for APC funding assistance  
146 in GOA journals for natural sciences through Research4life, foreign authors from developed countries

147 would nullify the eligibility for assistance with publication costs, forcing authors to seek closed-access or  
148 hybrid journals, low-impact open-access journals, or potentially predatory journals to publish their research.

149 To conclude, the current transition to GOA publishing by prestigious, high impact journals, namely  
150 in the natural sciences, shows trends in inequality in global research output. Inequality amongst institutions,  
151 publishers, journals, and researchers is likely to prevent adequate exposure of potentially important  
152 research, while promoting the false ideology that prestige and costliness of journal publications are the  
153 equivalent of reliable science (Brembs, 2018; Brembs, 2013; ElSabry, 2017; Siler, et al. 2018). In our  
154 current age of technology, most journals have flipped the publication model from print to digital and online  
155 (Beall, 2013; Fitzpatrick, 2011), and even with a decrease in hardcopy production, publication fees are still  
156 increasing (Morrison, 2018). Journal publications, research impact, and citations are the academic currency  
157 of career scientists and scholars (Hirsch, 2005) and the scientific community is international. We must  
158 address these issues to create a more inclusive environment for important research to be recognized and  
159 researchers to prosper on a global scale, regardless of country or institutional affiliation.

160

## 161 **Literature Cited**

162 Beall, J. (2013). Predatory publishing is just one of the consequences of gold open access. *Learned*  
163 *Publishing*, 26(2), 79-84.

164 Björk, B. C., & Solomon, D. (2013). The publishing delay in scholarly peer-reviewed journals. *Journal of*  
165 *informetrics*, 7(4), 914-923.

166 Brembs, B. (2018). Prestigious science journals struggle to reach even average reliability. *Frontiers in*  
167 *human neuroscience*, 12, 37.

168 Brembs, B., Button, K., & Munafò, M. (2013). Deep impact: unintended consequences of journal  
169 rank. *Frontiers in human Neuroscience*, 7, 291.



- 170 Burchardt, J. (2014). Researchers outside APC-financed open access: Implications for scholars without a  
171 paying institution. *SAGE open*, 4(4), 2158244014551714.
- 172 Ellers, J., Crowther, T. W., & Harvey, J. A. (2017). Gold open access publishing in mega-journals:  
173 Developing countries pay the price of western premium academic output. *Journal of scholarly*  
174 *publishing*, 49(1), 89-102.
- 175 ElSabry, E. (2017). Unaffiliated Researchers: A Preliminary Study. *Challenges*, 8(2), 20.
- 176 Fitzpatrick, K. (2011). *Planned obsolescence: Publishing, technology, and the future of the academy*. NYU  
177 press.
- 178 Fuchs, C., & Sandoval, M. (2013). The diamond model of open access publishing: Why policy makers,  
179 scholars, universities, libraries, labour unions and the publishing world need to take non-  
180 commercial, non-profit open access serious. *TripleC: Communication, capitalism &*  
181 *critique*, 11(2), 428-443.
- 182 Harnad, S., Brody, T., Vallières, F., Carr, L., Hitchcock, S., Gingras, Y., ... & Hilf, E. R. (2008). The  
183 access/impact problem and the green and gold roads to open access: An update. *Serials*  
184 *review*, 34(1), 36-40.
- 185 Hirsch, J. E. (2005). An index to quantify an individual's scientific research output. *Proceedings of the*  
186 *National academy of Sciences*, 102(46), 16569-16572.
- 187 Kassambara, A. (2020). ggpubr: 'ggplot2' Based Publication Ready Plots. R package version 0.2.5.  
188 <https://CRAN.R-project.org/package=ggpubr>
- 189 Keirstead, J. (2016) scholar: Analyse citation data from Google Scholar. R package
- 190 Lewis, D. W. (2012). The inevitability of open access. *College & research libraries*, 73(5), 493-506.

- 191 Morrison, H. (2008). directory of Open access Journals (dOaJ) (Doctoral dissertation, University of British  
192 Columbia).
- 193 Morrison, H. (2018). Frontiers: 40% journals have APC increases of 18 – 31% from 2017 to 2018.  
194 Sustaining the Knowledge Commons / Soutenir Les Savoirs Communs. Retrieved  
195 from [https://sustainingknowledgecommons.org/2018/04/12/frontiers-40-journals-have-apc-](https://sustainingknowledgecommons.org/2018/04/12/frontiers-40-journals-have-apc-increases-of-18-31-from-2017-to-2018/)  
196 [increases-of-18-31-from-2017-to-2018/](https://sustainingknowledgecommons.org/2018/04/12/frontiers-40-journals-have-apc-increases-of-18-31-from-2017-to-2018/)
- 197 Myers, N., Mittermeier, R. A., Mittermeier, C. G., Da Fonseca, G. A., & Kent, J. (2000). Biodiversity  
198 hotspots for conservation priorities. *Nature*, 403(6772), 853.
- 199 Piwowar, H., Priem, J., Larivière, V., Alperin, J. P., Matthias, L., Norlander, B., ... & Haustein, S. (2018).  
200 The state of OA: a large-scale analysis of the prevalence and impact of Open Access  
201 articles. *PeerJ*, 6, e4375.
- 202 Reich, E. S. (2013). Science publishing: The golden club. *Nature News*, 502(7471), 291.
- 203 Research4Life. (2015). Research4Life.
- 204 Research4Life. (2020). Research4life: Eligibility. retrieved from:  
205 <https://www.research4life.org/access/eligibility/>
- 206 Ryan, J. A., Ulrich, J. M., Thielen, W., Teetor, P., Bronder, S., & Ulrich, M. J. M. (2019). Package  
207 ‘quantmod’.
- 208 Siler, K., Haustein, S., Smith, E., Larivière, V., & Alperin, J. P. (2018). Authorial and institutional  
209 stratification in open access publishing: the case of global health research. *PeerJ*, 6, e4269.
- 210 Stocks, G., Seales, L., Paniagua, F., Maehr, E., & Bruna, E. M. (2008). The geographical and institutional  
211 distribution of ecological research in the tropics. *Biotropica*, 40(4), 397-404.
- 212 version 0.1.5. <http://github.com/jkeirstead/scholar>.

- 213 Wickham, H. (2012). reshape2: Flexibly reshape data: a reboot of the reshape package. *R package*  
214 *version, 1(2)*.
- 215 Wickham, H., Chang, W., & Wickham, M. H. (2016). Package ‘ggplot2’. *Create Elegant Data*  
216 *Visualisations Using the Grammar of Graphics. Version, 2(1)*, 1-189.
- 217 Wickham, H., Francois, R., Henry, L., & Müller, K. (2015). dplyr: A Grammar of Data Manipulation. R  
218 package version 0.4.3. *R Found. Stat. Comput., Vienna*. [https://CRAN.R-project.org/package=](https://CRAN.R-project.org/package=dplyr)  
219 *dplyr*.

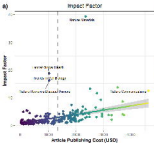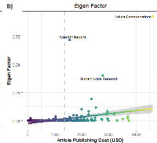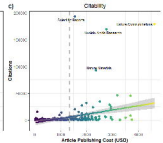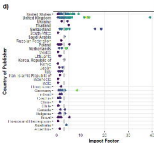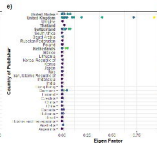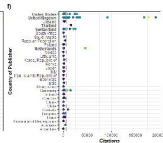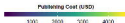

Source: https://www.biorxiv.org/content/10.1101/2020.03.12.988493v1.full.pdf
